# Supplementary material for: Facile synthesis of Mn2+ doped ultrathin (n = 2) NPLs and their application in anti-counterfeiting
Source: Royal Society of Chemistry journal article supplement (doi:10.1039/d2dt01102f), 2022-01-01
Supplement: d2dt01102f1.pdf [file d2dt01102f1.pdf]

## Supporting Information

### Facile synthesis of Mn<sup>2+</sup> doped ultrathin (n=2) NPLs and their application to anti-counterfeiting

*Jia qi Tao, Zhang Hu,<sup>†</sup> Wengang Bi, Xiaohui Liu,<sup>\*</sup> Chao Fan, and Chun Sun,<sup>\*</sup>*

<sup>\*</sup>E-mail: [cs@hebut.edu.cn](mailto:cs@hebut.edu.cn) (Chun Sun), Email: [liuxiaohui@bttc.edu.cn](mailto:liuxiaohui@bttc.edu.cn) (Xiaohui Liu)

---

## Experimental section

**Chemicals:** Cesium carbonate ( $\text{Cs}_2\text{CO}_3$ , 99.9%) and bromotrimethylsilane (TMSBr, 97%) were purchased from J&K. Lead bromide ( $\text{PbBr}_2$ , 99%) and manganese bromide ( $\text{MnBr}_2$ , 98%) were purchased from Macklin Inc. Silver acetate (99%) was purchased from Adamas-bate. Oleylamine (OLA, 85%), tetra octyl ammonium bromide (TOAB, 98%), octanoic acid (OTAc, 99%) and dodecylbenzene sulfonic acid (DBSA, 90%) were purchased from Aladdin. Oleic acid (OA, 85%) was purchased from TCI. Toluene was purchased from Kermel. Dimethicone was purchased from Shanghai Lichenkeji. All chemicals were used without further purification.

### Preparation of cesium-oleate precursor:

0.0325g  $\text{Cs}_2\text{CO}_3$ , 0.5 mL OTAc and 9.5 mL toluene were dissolved in a vial.

### Preparation of $\text{PbBr}_2/\text{MnBr}_2$ precursor:

0.0458g  $\text{PbBr}_2$ , 0.0268g  $\text{MnBr}_2$  and 0.2734g TOAB were dissolved in 2.5 mL toluene.

### Preparation of Ag precursor:

0.4 mmol silver acetate, 0.3 mL DBSA, 0.5 mL OLA, and 1.5 mL toluene were added into a vial and the mixture was stirred at 40°C until the solution became clear.

### Synthesis of $\text{Mn}^{2+}$ doped $\text{CsPbBr}_3$ NPLs:

270  $\mu\text{L}$   $\text{PbBr}_2/\text{MnBr}_2$  precursor, 200  $\mu\text{L}$  TMSBr, 100  $\mu\text{L}$  Ag precursor and 1 mL toluene were loaded into a vial. Then 500  $\mu\text{L}$  cesium-oleate precursor solution was injected in the vial swiftly. The whole solution was left to stir for one hour at room temperature.

### Synthesis of $\text{CsPbBr}_3$ NPLs (blue):

The  $\text{CsPbBr}_3$  NPLs were prepared by an approach reported previously..<sup>[1]</sup>

### Synthesis of $\text{Mn}^{2+}$ doped $\text{CsPbBr}_3$ NPLs@PMMA:

$\text{MnBr}_2$  precursor was prepared by dissolving 0.1mmol  $\text{MnBr}_2$ , 30 $\mu\text{L}$  OLA and 30 $\mu\text{L}$  OA into 2mL toluene.

2g PMMA was dissolved in 6mL toluene to prepare PMMA solution.

2mL  $\text{Mn}^{2+}$  doped  $\text{CsPbBr}_3$  NPL crude solution was mixed with 2mL dimethicone. Then, the resulting mixture was centrifuged at 5000rpm. The precipitates were collected and dispersed in 0.1mL  $\text{MnBr}_2$  precursor and 0.5mL PMMA solution. Then the solution was spin-coated on the glass slide.

### Characterization

The UV-Vis absorption spectra were performed using a MAPADA UV-1800PC UV-

---

Vis spectrometer. The PL and PLE spectra were conducted by a FLS920P spectrometer. The absolute PLQYs and time-resolved PL decays of the samples were measured by a fluorescence spectrometer (FLS920P, Edinburgh Instruments). The ICP measurements were measured by an ICP Optima 8300. The XRD patterns were measured on a Rigaku Smart Lab 9 kW.

### Equation S1.

$$k_{FRET} = \frac{1}{\tau_{DA}} - \frac{1}{\tau_D}$$

where  $\tau_{DA}$  and  $\tau_D$  are the exciton lifetime in the presence and absence of  $Mn^{2+}$  ions, respectively. For  $Mn^{2+}$  doped  $CsPbBr_3$  NPLs with Pb:Mn ratio of 1:1, the  $\tau_{DA}$  is 0.91ns. The  $\tau_D$  is 2.42ns, which is described as below. According to the above formula, the value of  $k_{FRET}$  can be obtained as 68.5%.

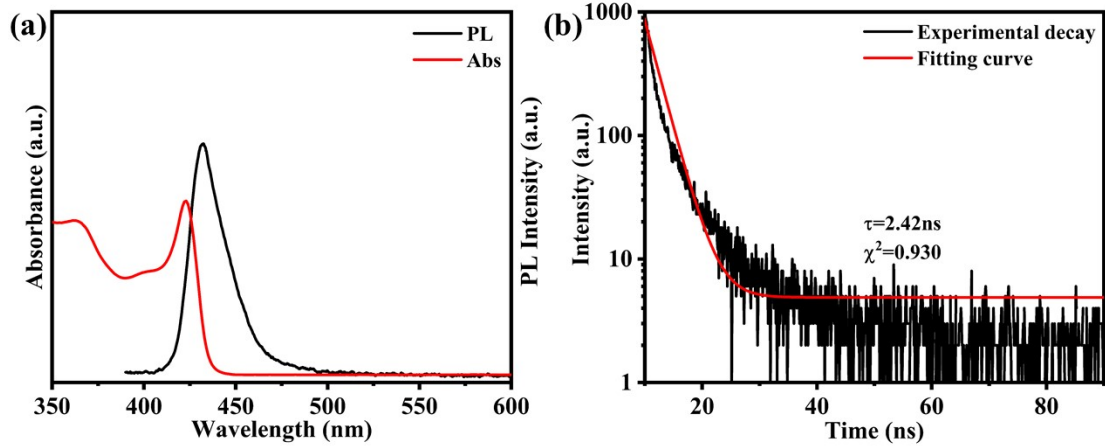

**Figure S1.** (a) PL and absorption spectra of the sample without  $MnBr_2$ . (b) PL decay and fitted curve of the peak at 435nm for the sample without  $MnBr_2$ .

The un-doped  $CsPbBr_3$  NPLs have been synthesized without the addition of  $MnBr_2$ . As can be seen from Figure S1(a), the both the PL and absorption spectra of un-doped  $CsPbBr_3$  NPLs show only one exciton peak, which belong to the  $n=2$  phase. Time-resolved PL decays (TRPL) for un-doped  $CsPbBr_3$  NPLs are performed. As shown in Figure R1(b), the lifetime of un-doped NPLs is 2.42 ns, which is longer than the Mn-doped one. All of these demonstrate that Mn ions have been successfully doped in the NPLs.

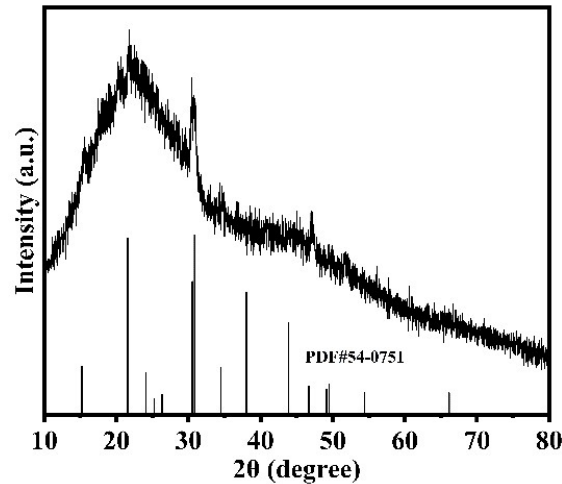

**Figure S2.** The powder XRD pattern of the sample.

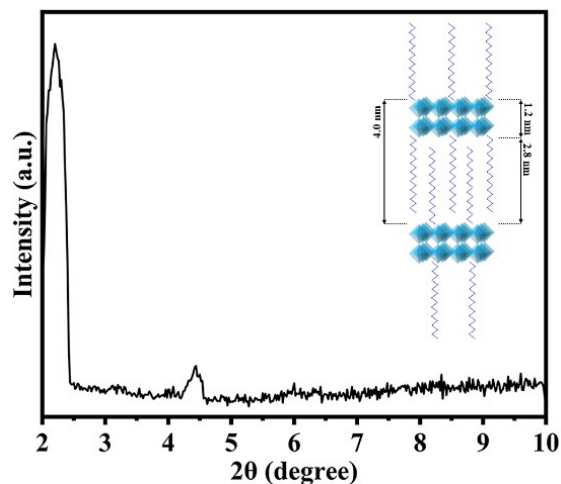

**Figure S3.** The small angle XRD pattern of the sample (Inset is photograph of the dimensions of the n=2 NPLs).

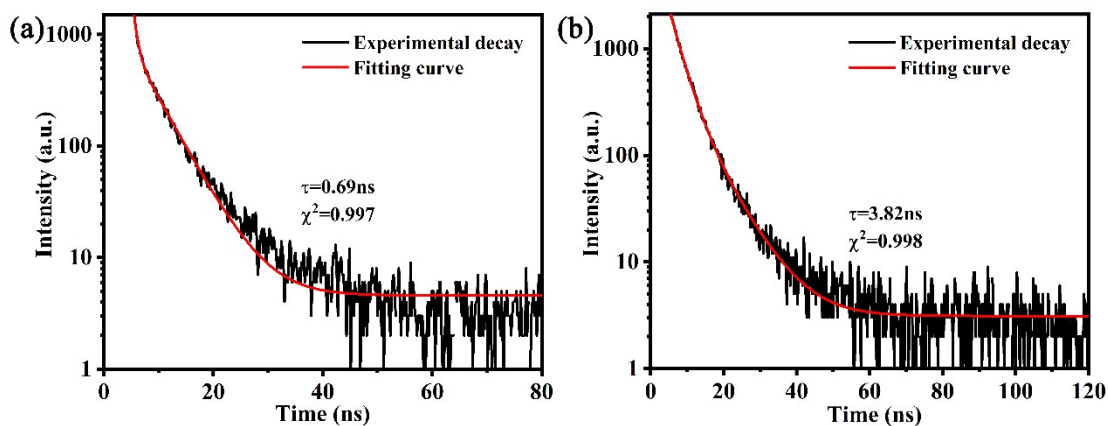

**Figure S4.** (a) PL decay and fitted curve of the peak (435nm) of the mixture. (b) PL decay and fitted curve of the exciton peak (465nm) of CsPbBr<sub>3</sub> NPLs (n=3)

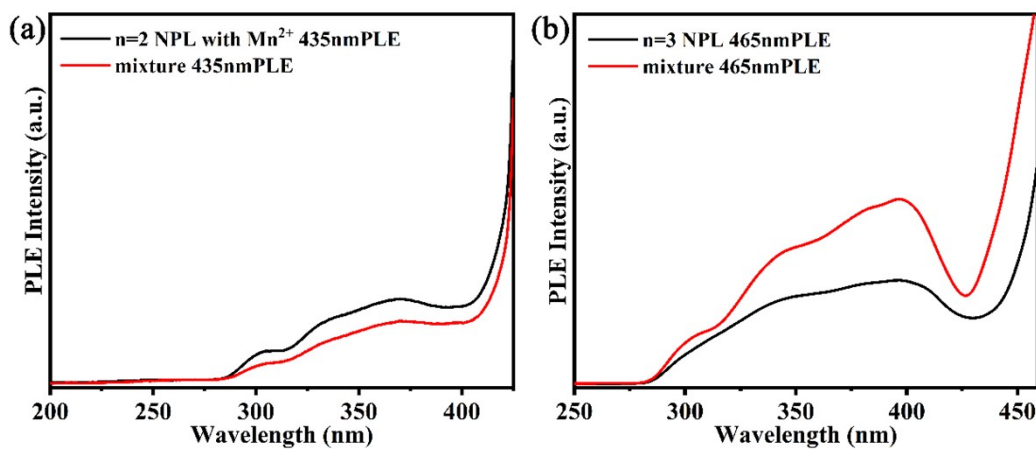

**Figure S5.** (a) PLE spectra of Mn<sup>2+</sup> doped CsPbBr<sub>3</sub> NPLs and the mixture monitored at 435 nm. (b) PLE spectra of CsPbBr<sub>3</sub> NPLs and the mixture monitored at 465 nm.

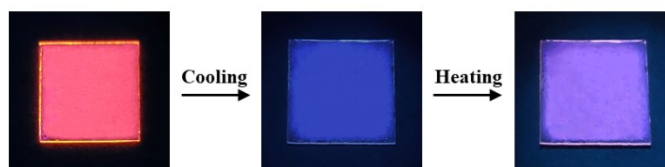

**Figure S6.** Stimuli-responsive progress of  $\text{Mn}^{2+}$  doped  $\text{CsPbBr}_3$  NPLs@PMMA without  $\text{MnBr}_2$  precursor (heating and cooling represent that the conditions are  $100^\circ\text{C}$  and  $25^\circ\text{C}$ , respectively).

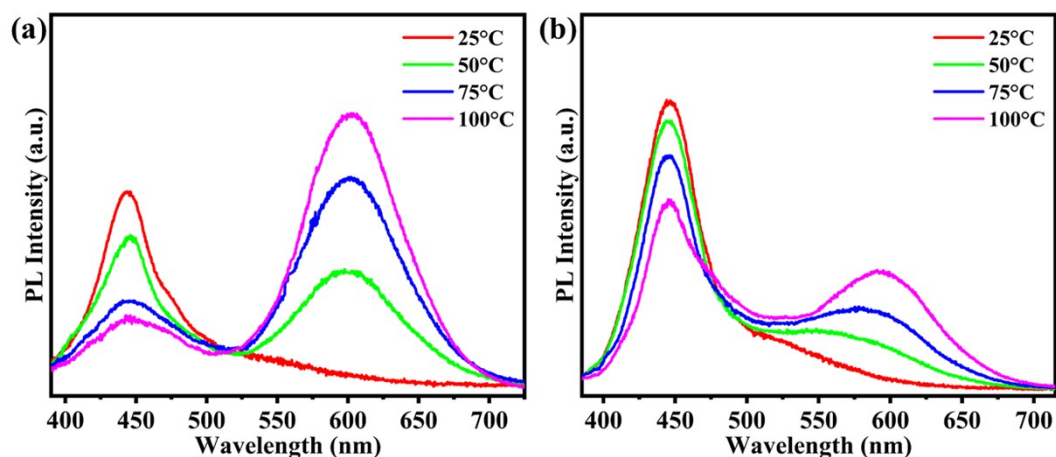

**Figure S7.** The temperature-dependence PL spectra of the films prepared from (a) the solution with  $\text{MnBr}_2$  precursor and (b) the pristine solution.

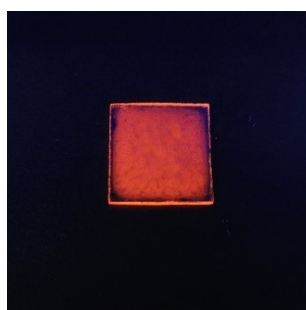

**Figure S8.** The film of  $\text{Mn}^{2+}$  doped  $\text{CsPbBr}_3$  NPLs at elevated temperature after being placed in the air for ten days.

**Table S1.** The actual doping ratio of Pb:Mn obtained from ICP.

| the nominal ratio of Pb:Mn | the doping ratio of Pb:Mn from ICP | the doping level of Mn from ICP |
|----------------------------|------------------------------------|---------------------------------|
| 1:0.5                      | 1:0.38                             | 27.5%                           |
| 1:1                        | 1:0.63                             | 38.6%                           |
| 1:2                        | 1:1.14                             | 53.3%                           |

---

## REFERENCES

- [1] S. Su, J. Tao, C. Sun, D. Xu, H. Zhang, T. Wei, Z.-H. Zhang, Z. Wang, C. Fan, W. Bi, Chem. Eng. J. 2021, 419, 129612.
